# Supplementary material for: Adsorption and sensor performance of transition metal-decorated zirconium-doped silicon carbide nanotubes for NO2 gas application: a computational insight
Source: Royal Society of Chemistry journal article supplement (doi:10.1039/d3ra08796d), 2024-01-01
Supplement: d3ra08796d1.pdf [file d3ra08796d1.pdf]

## Supporting Information

# Adsorption and sensor performance of transition metals decorated zirconium-doped silicon carbide nanotubes for NO<sub>2</sub> gas application: A computational insight

Ismail O. Amodu <sup>1,2</sup>, Faith A. Olaojotule <sup>1</sup>, Miracle N. Ogbogu <sup>1</sup>, Oluwatobi A. Olaiya <sup>2</sup>, Innocent Benjamin <sup>3,1</sup>, Adedapo S. Adeyinka <sup>4</sup>, and Hitler Louis <sup>1,5\*</sup>

<sup>1</sup> Computational and Bio-Simulation Research Group, University of Calabar, Calabar, Nigeria

<sup>2</sup> Department of Mathematics, University of Calabar, Calabar, Nigeria

<sup>3</sup> Department of Research Analytics, Saveetha Dental College and Hospitals, Saveetha Institute of Medical and Technical Sciences, Saveetha University, Chennai-India

<sup>4</sup> Department of Chemical Sciences, University of Johannesburg, Pretoria, South Africa

<sup>5</sup> School of Chemistry, University of Leeds, Leeds LS2 9JT, United Kingdom

\*Corresponding author's email: [louismuzong@gmail.com](mailto:louismuzong@gmail.com)

**Table S1.** Result of the molecular dynamic simulations for the surfaces before interactions.

| <b>Parameters</b>      | <b>Initial</b> | <b>Final</b> | <b>Average <math>\pm</math> Std. Dev</b> |
|------------------------|----------------|--------------|------------------------------------------|
| <b>Zr@SiCNT</b>        |                |              |                                          |
| Tot. energy (kcal/mol) | 83.032         | 83.200       | 83.263 $\pm$ 0.043                       |
| Pot. energy (kcal/mol) | -4.019         | 40.205       | 39.957 $\pm$ 2.629                       |
| Kin. energy (kcal/mol) | 87.051         | 42.995       | 43.305 $\pm$ 2.611                       |
| Temperature (K)        | 298.000        | 147.183      | 148.246 $\pm$ 8.940                      |
| <b>Ag_Zr@SiCNT</b>     |                |              |                                          |
| Tot. energy (kcal/mol) | 105.906        | 106.307      | 106.288 $\pm$ 0.049                      |
| Pot. energy (kcal/mol) | 17.967         | 61.647       | 60.202 $\pm$ 2.863                       |
| Kin. energy (kcal/mol) | 87.940         | 44.660       | 46.086 $\pm$ 2.844                       |
| Temperature (K)        | 298.000        | 151.340      | 156.171 $\pm$ 9.639                      |
| <b>Au_Zr@SiCNT</b>     |                |              |                                          |
| Tot. energy (kcal/mol) | 93.492         | 93.841       | 93.832 $\pm$ 0.059                       |
| Pot. energy (kcal/mol) | 5.552          | 50.782       | 48.762 $\pm$ 2.815                       |
| Kin. energy (kcal/mol) | 87.940         | 43.059       | 45.070 $\pm$ 2.786                       |
| Temperature (K)        | 298.000        | 145.912      | 152.729 $\pm$ 9.441                      |
| <b>Cu_Zr@SiCNT</b>     |                |              |                                          |
| Tot. energy (kcal/mol) | 196.393        | 196.763      | 196.758 $\pm$ 0.046                      |
| Pot. energy (kcal/mol) | 108.453        | 151.229      | 148.579 $\pm$ 3.039                      |
| Kin. energy (kcal/mol) | 87.940         | 45.534       | 48.179 $\pm$ 3.019                       |
| Temperature (K)        | 298.000        | 154.300      | 163.262 $\pm$ 10.229                     |

| Parameters                          | Initial | Final   | Average $\pm$ Std. Dev |
|-------------------------------------|---------|---------|------------------------|
| <b>NO<sub>2</sub>_n_Zr@SiCNT</b>    |         |         |                        |
| Tot. energy (kcal/mol)              | 288.863 | 289.248 | 289.270 $\pm$ 0.045    |
| Pot. energy (kcal/mol)              | 199.146 | 241.591 | 244.539 $\pm$ 2.641    |
| Kin. energy (kcal/mol)              | 89.716  | 47.656  | 44.731 $\pm$ 2.620     |
| Temperature (K)                     | 298.000 | 158.294 | 148.577 $\pm$ 8.703    |
| <b>NO<sub>2</sub>_n_Ag_Zr@SiCNT</b> |         |         |                        |
| Tot. energy (kcal/mol)              | 361.520 | 361.790 | 361.871 $\pm$ 0.048    |
| Pot. energy (kcal/mol)              | 270.915 | 316.830 | 313.882 $\pm$ 2.845    |
| Kin. energy (kcal/mol)              | 90.605  | 44.959  | 47.990 $\pm$ 2.824     |
| Temperature (K)                     | 298.000 | 147.872 | 157.838 $\pm$ 9.287    |
| <b>NO<sub>2</sub>_n_Au_Zr@SiCNT</b> |         |         |                        |
| Tot. energy (kcal/mol)              | 222.790 | 222.956 | 223.068 $\pm$ 0.036    |
| Pot. energy (kcal/mol)              | 132.186 | 163.826 | 170.142 $\pm$ 3.335    |
| Kin. energy (kcal/mol)              | 90.605  | 59.131  | 52.926 $\pm$ 3.318     |
| Temperature (K)                     | 298.000 | 194.483 | 174.076 $\pm$ 10.914   |
| <b>NO<sub>2</sub>_n_Cu_Zr@SiCNT</b> |         |         |                        |
| Tot. energy (kcal/mol)              | 187.956 | 188.283 | 188.265 $\pm$ 0.042    |
| Pot. energy (kcal/mol)              | 97.351  | 143.941 | 143.052 $\pm$ 2.702    |
| Kin. energy (kcal/mol)              | 90.605  | 44.342  | 45.213 $\pm$ 2.682     |
| Temperature (K)                     | 298.000 | 145.840 | 148.706 $\pm$ 8.821    |

**Table S2.** Result of the molecular dynamic simulations for the resulting complexes due to the n-site of adsorption

| Parameters                       | Initial | Final   | Average $\pm$ Std. Dev |
|----------------------------------|---------|---------|------------------------|
| <b>NO<sub>2</sub>_o_Zr@SiCNT</b> |         |         |                        |
| Tot. energy (kcal/mol)           | 146.233 | 146.601 | 146.562 $\pm$ 0.038    |

**Table S3.** Result of the molecular dynamic simulations for the resulting complexes due to the o-site of adsorption

|                                     |         |         |                  |
|-------------------------------------|---------|---------|------------------|
| Pot. energy (kcal/mol)              | 56.516  | 102.623 | 101.859 ± 2.633  |
| Kin. energy (kcal/mol)              | 89.716  | 43.978  | 44.702 ± 2.617   |
| Temperature (K)                     | 298.000 | 146.078 | 148.483 ± 8.694  |
| <b>NO<sub>2</sub>_o_Ag_Zr@SiCNT</b> |         |         |                  |
| Tot. energy (kcal/mol)              | 305.996 | 306.517 | 306.427 ± 0.077  |
| Pot. energy (kcal/mol)              | 215.391 | 264.480 | 261.080 ± 2.683  |
| Kin. energy (kcal/mol)              | 90.605  | 42.037  | 45.348 ± 2.645   |
| Temperature (K)                     | 298.000 | 138.261 | 149.149 ± 8.700  |
| <b>NO<sub>2</sub>_o_Au_Zr@SiCNT</b> |         |         |                  |
| Tot. energy (kcal/mol)              | 213.363 | 213.858 | 213.841 ± 0.092  |
| Pot. energy (kcal/mol)              | 122.758 | 163.526 | 161.273 ± 3.945  |
| Kin. energy (kcal/mol)              | 90.605  | 50.332  | 52.569 ± 3.908   |
| Temperature (K)                     | 298.000 | 165.543 | 172.899 ± 12.854 |
| <b>NO<sub>2</sub>_o_Cu_Zr@SiCNT</b> |         |         |                  |
| Tot. energy (kcal/mol)              | 329.161 | 329.525 | 329.521 ± 0.067  |
| Pot. energy (kcal/mol)              | 238.556 | 280.427 | 279.460 ± 3.098  |
| Kin. energy (kcal/mol)              | 90.605  | 49.098  | 50.060 ± 3.069   |
| Temperature (K)                     | 298.000 | 161.485 | 164.650 ± 10.094 |

---
